# Supplementary material for: Investigation of the C1 polymerizability of diazoacetamide: alternating C1-cyclocopolymerization of hetero-bis(diazocarbonyl) compounds bearing diazoacetate and diazoacetamide units
Source: Royal Society of Chemistry journal article supplement (doi:10.1039/d5py00890e), 2026-01-01
Supplement: d5py00890e1.pdf [file d5py00890e1.pdf]

*Supplementary Information for*

**Investigation of C1 Polymerizability of Diazoacetamide: Alternating C1-cyclocopolymerization of  
Hetero-bis(diazocarbonyl) Compound Bearing Diazoacetate and Diazoacetamide Units**

Hiroaki Shimomoto,\* Haruki Ichihara, Yuhi Ito, Akihiro Watanabe, Tomomichi Itoh, and Eiji Ihara\*

*Department of Applied Chemistry, Graduate School of Science and Engineering, Ehime University, 3  
Bunkyo-cho, Matsuyama 790-8577, Japan*

Phone & Fax: +81-89-927-9949; e-mail: shimomoto.hiroaki.mx@ehime-u.ac.jp (H. S.)

Phone & Fax: +81-89-927-8547; e-mail: ihara@ehime-u.ac.jp (E. I.)

## Experimental Section

### Materials

Tetrahydrofuran (THF, Kanto Chemical, >99.5%, dehydrated Super Plus grade) was used after passage through solvent purification columns (Nikko Hansen & Co., Glass Contour MINI). Diethyl ether (Kanto Chemical, >99.5%, dehydrated), *N,N*-dimethylformamide (Kanto Chemical, >99.5%, super dehydrated), chloroform (Junsei Chemical, 99%), dichloromethane (FUJIFILM Wako Pure Chemical, Guaranteed Reagent), acetonitrile (Kanto Chemical, >99.5%, super dehydrated), hexane (FUJIFILM Wako Pure Chemical, >96.0%), ethyl acetate (FUJIFILM Wako Pure Chemical, >99.5%), methanol (Yoneyama Yakuhin Kogyo, >99%), allylpalladium(II) chloride dimer ( $\pi$ -allylPdCl, Sigma-Aldrich, >98.0%), allyl[1,3-bis(2,6-diisopropylphenyl)imidazol-2-ylidene]palladium(II) chloride [(NHC)Pd(nq), Sigma-Aldrich, >98.0%], sodium tetraphenylborate (NaBPh<sub>4</sub>, Tokyo Chemical Industry, >99.5%), ethylene glycol (Nacalai Tesque, >99.0%), imidazole (Tokyo Chemical Industry, >98.0%), *tert*-butyldiphenylchlorosilane (*t*-BuPh<sub>2</sub>SiCl, Kanto Chemical, >95.0%), *o*-xylylenedibromide (Tokyo Chemical Industry, >98.0%), 2-anilinoethanol (Tokyo Chemical Industry, >98.0%), tetrabutylammonium fluoride (TBAF, *ca.* 1 M in THF, Tokyo Chemical Industry), pyridine (Kanto Chemical, >99.5%), bromoacetyl bromide (Sigma-Aldrich, >98.0%), 1,8-diazabicyclo[5.4.0]-7-undecene (DBU, Tokyo Chemical Industry, >98%), aniline (FUJIFILM Wako Pure Chemical, >98%), salicylaldehyde (Tokyo Chemical Industry, >98%), *N*-methylaniline (Kanto Chemical, >98%), lithium aluminum hydride (LiAlH<sub>4</sub>, Kanto Chemical, >92%), sodium hydride (NaH, Nacalai Tesque, with approx. 40% paraffin liquid), hydrochloric acid (Nacalai Tesque, 35–37%), Na<sub>2</sub>SO<sub>4</sub> (Nacalai Tesque, > 98.5%), and CaH<sub>2</sub> (Nacalai Tesque, >90.0%) were used as received. *N,N'*-ditosylhydrazine was synthesized according to the literature.<sup>1</sup>

### Synthesis of monomers and their precursors

Ethyl diazoacetate (EDA),<sup>2</sup> 2-diazo-*N*-methyl-*N*-phenylacetamide (**M1**),<sup>3</sup> *N,N*-dibenzyl-2-diazoacetamide (**M2**)<sup>3</sup> 2-diazo-1-(piperidin-1-yl)ethanone (**M3**),<sup>4</sup> and *N*-*n*-hexyl diazoacetamide (**M4**)<sup>5</sup> were synthesized according to the literatures. EDA was dried over CaH<sub>2</sub> and stored as a dichloromethane solution. The concentrations of EDA were determined with trichloroethylene (Katayama Chemical) as an internal standard by using <sup>1</sup>H NMR spectroscopy. **Caution!** Extra care must be taken for syntheses and handling of the diazocarbonyl compounds because of their potential explosiveness.

2-[(*tert*-Butyldiphenylsilyl)oxy]ethanol (**1**) was prepared according to the literature.<sup>6</sup>

### Preparation of **2**.

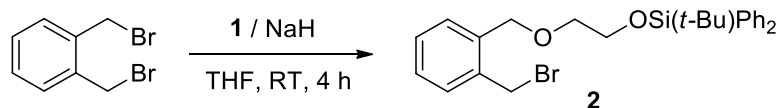

Under a N<sub>2</sub> atmosphere, a THF (30 mL) suspension of NaH (0.69 g, 29 mmol) was placed in a round bottomed flask equipped with a three-way cock, and was cooled to 0 °C. At 0 °C, a THF (34 mL) solution of **1** (7.2 g, 24 mmol) was added dropwise to the suspension, and the mixture was warmed to room temperature and stirred for 10 min. At room temperature, a THF (24 mL) solution of *o*-xylylenedibromide (6.3 g, 24 mmol) was added dropwise, and the mixture was stirred at room temperature for 4 h. H<sub>2</sub>O (90 mL) was added to quench the remaining NaH, and THF was removed using an evaporator. After CH<sub>2</sub>Cl<sub>2</sub> (90 mL) was added to the residual aqueous suspension, the mixture was transferred to a separatory funnel, with which the organic layer was separated using additional CH<sub>2</sub>Cl<sub>2</sub> (90 mL × 2) and washed with

saturated aqueous NaCl solution and water. The organic layer was dried over Na<sub>2</sub>SO<sub>4</sub>. After the volatiles were removed under reduced pressure, the residue was subjected to purification with preparative recycling SEC using CHCl<sub>3</sub> as an eluent to afford **2** as pale yellow viscous oil (5.6 g, 12 mmol) in 49% yield.

<sup>1</sup>H NMR (500 MHz, CDCl<sub>3</sub>,  $\delta$ ): 7.71–7.28 (m, 14H, Ar-*H*), 4.70 (s, 2H, PhCH<sub>2</sub>), 4.63 (s, 2H, PhCH<sub>2</sub>), 3.85 (t, *J* = 5.0 Hz, 2H, OCH<sub>2</sub>), 3.65 (t, *J* = 5.0 Hz, 2H, OCH<sub>2</sub>), 1.06 (s, 9H, *t*-Bu).

#### Preparation of **3**.

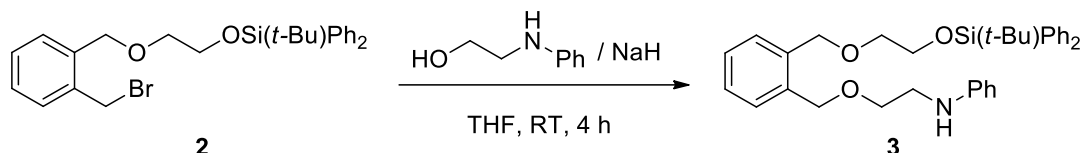

Under a N<sub>2</sub> atmosphere, a THF (10 mL) suspension of NaH (0.097 g, 4.0 mmol) was placed in a round bottomed flask equipped with a three-way cock, and was cooled to 0 °C. At 0 °C, 2-anilinoethanol (0.50 mL, 4.0 mmol) was added dropwise to the suspension, and the mixture was warmed to room temperature and stirred for 10 min. At room temperature, a THF (14 mL) solution of **2** (0.97 g, 2.0 mmol) was added dropwise, and the mixture was stirred at room temperature for 4 h. H<sub>2</sub>O (24 mL) was added to quench the remaining NaH, and THF was removed using an evaporator. After CH<sub>2</sub>Cl<sub>2</sub> (24 mL) were added to the residual aqueous suspension, the mixture was transferred to a separatory funnel, with which the organic layer was separated using additional CH<sub>2</sub>Cl<sub>2</sub> (24 mL  $\times$  2) and washed with saturated aqueous NaCl solution and water. The organic layer was dried over Na<sub>2</sub>SO<sub>4</sub>. After the volatiles were removed under reduced pressure, the residue was subjected to purification with flash chromatography using CHCl<sub>3</sub> as an eluent to afford **3** as yellow viscous oil (1.0 g, 1.9 mmol) in 93% yield.

<sup>1</sup>H NMR (500 MHz, CDCl<sub>3</sub>,  $\delta$ ): 7.71–6.60 (m, 19H, Ar-*H*), 4.62 (s, 2H, PhCH<sub>2</sub>), 4.61 (s, 2H, PhCH<sub>2</sub>), 4.03 (s, 1H, NH), 3.83 (t, *J* = 5.3 Hz, 2H, OCH<sub>2</sub>), 3.66 (t, *J* = 5.3 Hz, 2H, OCH<sub>2</sub>), 3.59 (t, *J* = 5.0 Hz, 2H, OCH<sub>2</sub>), 3.29 (t, *J* = 5.3 Hz, 2H, NCH<sub>2</sub>), 1.06 (s, 9H, *t*-Bu).

#### Preparation of **4**.

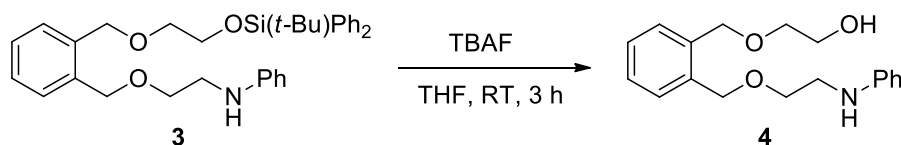

Under a N<sub>2</sub> atmosphere, a THF (10 mL) solution of **3** (0.47 g, 0.86 mmol) was placed in a round bottomed flask equipped with a three-way cock. At room temperature, TBAF (1 M THF solution, 0.3 mL, 3 mmol) was added dropwise to the solution, and the mixture was stirred for 3 h at room temperature. After H<sub>2</sub>O (10 mL) was added, THF was removed using an evaporator. The resulting residue was transferred to a separatory funnel with CHCl<sub>3</sub> (10 mL), and the organic layer was separated using additional CHCl<sub>3</sub> (10 mL  $\times$  2) and washed with saturated aqueous NaCl solution and water. The organic layer was dried over Na<sub>2</sub>SO<sub>4</sub>. After the volatiles were removed under reduced pressure, the residue was subjected to purification with flash chromatography on silica gel using a gradient mixture of hexane and AcOEt (hexane/AcOEt = 1:0–3:1) as an eluent to afford **4** as yellow viscous oil (0.19 g, 0.62 mmol) in 71% yield.

<sup>1</sup>H NMR (500 MHz, CDCl<sub>3</sub>,  $\delta$ ): 7.39–7.36 (m, 2H, Ar-*H*), 7.33–7.30 (m, 2H, Ar-*H*), 7.18–7.15 (m, 2H, Ar-*H*), 6.72–6.69 (m, 1H, Ar-*H*), 6.63–6.61 (m, 2H, Ar-*H*), 4.63 (s, 2H, PhCH<sub>2</sub>), 4.63 (s, 2H, PhCH<sub>2</sub>), 4.17 (br-s, 1H, NH), 3.72 (m, 2H, OCH<sub>2</sub>), 3.72 (m, 2H, OCH<sub>2</sub>), 3.59 (t, *J* = 4.5 Hz, 2H, OCH<sub>2</sub>), 3.22 (t, *J* = 5.3 Hz, 2H, NCH<sub>2</sub>), 2.49 (br-s, 1H, OH)

### Preparation of **5**.

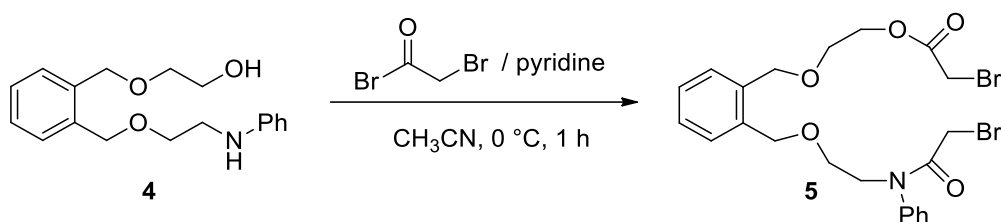

Under a  $N_2$  atmosphere, an acetonitrile (25 mL) solution of **4** (1.0 g, 3.4 mmol) and pyridine (0.83 mL, 10 mmol) was placed in a round bottomed flask equipped with a three-way cock and was cooled to 0 °C. At 0 °C, bromoacetyl bromide (0.75 mL, 8.6 mmol) was added dropwise to the solution, and the mixture was stirred at 0 °C for 1 h. After  $H_2O$  (25 mL) was added, acetonitrile was removed using an evaporator. The residual aqueous suspension was transferred to a separatory funnel with  $CHCl_3$  (25 mL), with which the organic layer was separated using additional  $CHCl_3$  (25 mL  $\times$  2) and washed with saturated aqueous NaCl solution and water. The organic layer was dried over  $Na_2SO_4$ . After the volatiles were removed under reduced pressure, the residue was subjected to purification with preparative recycling SEC using  $CHCl_3$  as an eluent to afford bis-bromoacetylated compound **5** as dark brown viscous oil (1.8 g, 3.3 mmol) in 96% yield.

$^1H$  NMR (500 MHz,  $CDCl_3$ ,  $\delta$ ): 7.43–7.26 (m, 9H, Ar-*H*), 4.60 (s, 2H,  $PhCH_2$ ), 4.57 (s, 2H,  $PhCH_2$ ), 4.33 (t,  $J$  = 4.8 Hz, 2H,  $OCH_2$ ), 3.95 (t,  $J$  = 5.8 Hz, 2H,  $OCH_2$ ), 3.85 (s, 2H,  $COCH_2$ ), 3.68 (t,  $J$  = 4.8 Hz, 2H,  $OCH_2$ ), 3.66 (t,  $J$  = 5.8 Hz, 2H,  $NCH_2$ ), 3.64 (s, 2H,  $COCH_2$ )

### Preparation of **M5**.

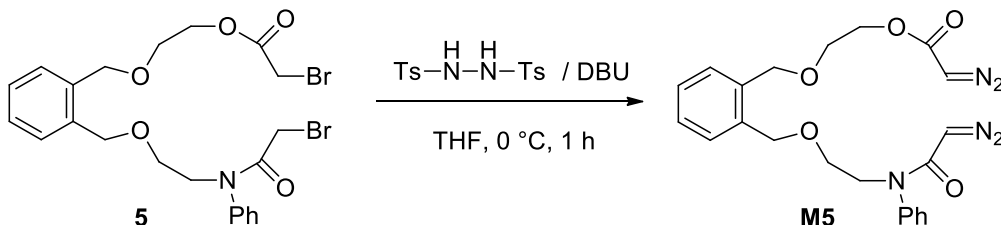

Under a  $N_2$  atmosphere, a THF (40 mL) solution of **5** (1.8 g, 3.3 mmol) and *N,N'*-ditosylhydrazine (6.7 g, 20 mmol) was placed in a round bottomed flask equipped with a three-way cock and was cooled to 0 °C. At 0 °C, DBU (7.4 mL, 49 mmol) was added dropwise to the solution, and the mixture was stirred at 0 °C for 1h. After saturated  $NaHCO_3$  aqueous solution (40 mL) was added, THF was removed using an evaporator. The residual aqueous suspension was transferred to a separatory funnel with  $CHCl_3$  (40 mL), with which the organic layer was separated using additional  $CHCl_3$  (40 mL  $\times$  2) and washed with saturated aqueous NaCl solution and water. The organic layer was dried over  $Na_2SO_4$ . After the volatiles were removed under reduced pressure, the residue was subjected to purification with flash chromatography using a mixture of hexane and AcOEt (hexane : AcOEt = 9 : 1–0 : 1) as an eluent to afford **M5** as yellow viscous oil (1.1 g, 2.6 mmol) in 78% yield.

$^1H$  NMR (500 MHz,  $CDCl_3$ ,  $\delta$ ): 7.39–7.20 (m, 9H, Ar-*H*), 4.81 (br-s, 1H,  $N_2-CH-CO_2$ ), 4.58 (s, 2H,  $PhCH_2$ ), 4.57 (s, 2H,  $PhCH_2$ ), 4.43 (s, 1H,  $N_2-CH-CON$ ), 4.31 (t,  $J$  = 4.8 Hz, 2H,  $OCH_2$ ), 3.97 (t,  $J$  = 5.8 Hz, 2H,  $OCH_2$ ), 3.67 (t,  $J$  = 5.8 Hz, 2H,  $NCH_2$ ), 3.65 (t,  $J$  = 4.8 Hz, 2H,  $OCH_2$ ).

$^{13}C$  NMR (126 MHz,  $CDCl_3$ ,  $\delta$ ): 167.0 (br,  $N_2-CH-CO_2$ ), 166.0 ( $N_2-CH-CON$ ), 142.0 [Ar-C, quaternary (q.)], 136.6 (Ar-C, q.), 135.9 (Ar-C, q.), 129.8 (Ar-C), 128.8 (Ar-C), 128.8 (Ar-C), 128.6 (Ar-C), 128.2 (Ar-C), 128.0 (Ar-C), 127.9 (Ar-C), 70.9 ( $CH_2$ ), 70.5 ( $CH_2$ ), 68.3 ( $CH_2$ ), 67.9 ( $CH_2$ ), 64.1 ( $CH_2$ ), 49.1 ( $CH_2$ ), 47.6 ( $N_2-CH-CON$ ), 46.5 (br,  $N_2-CH-$

CO<sub>2</sub>).

Elemental analyses: Anal. Calcd for C<sub>22</sub>H<sub>23</sub>N<sub>5</sub>O<sub>5</sub> + 1/2 H<sub>2</sub>O: C, 59.32; H, 5.43; N, 15.72. Found: C, 59.32; H, 5.37; N, 14.76.

#### Preparation of **6**.

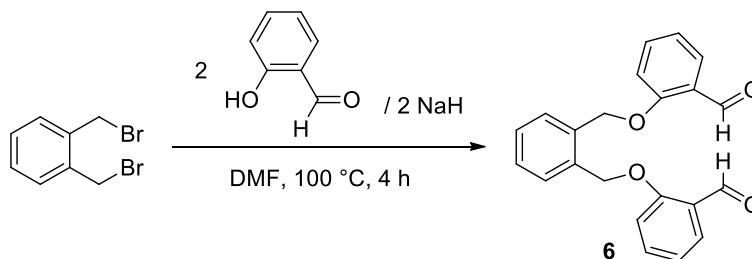

Under a N<sub>2</sub> atmosphere, a DMF (40 mL) suspension of NaH (0.34 g, 14 mmol) and *o*-xylylenedibromide (1.5 g, 5.7 mmol) was placed in a round bottomed flask equipped with a three-way cock and was cooled to 0 °C. At 0 °C, salicylaldehyde (1.5 mL, 14 mmol) was added dropwise to the suspension, and the mixture was stirred at 100 °C for 4 h. After H<sub>2</sub>O (20 mL) and CH<sub>2</sub>Cl<sub>2</sub> (60 mL) were added, the mixture was transferred to a separatory funnel, with which the organic layer was separated using additional CH<sub>2</sub>Cl<sub>2</sub> (60 mL × 2) and washed with saturated aqueous NaCl solution and water. The organic layer was dried over Na<sub>2</sub>SO<sub>4</sub>. After the volatiles were removed under reduced pressure, the residue was subjected to purification with preparative recycling SEC using CHCl<sub>3</sub> as an eluent to afford **6** as a colorless solid (2.0 g, 5.7 mmol) in quantitative yield.

<sup>1</sup>H NMR (400 MHz, CDCl<sub>3</sub>,  $\delta$ ): 10.5 (s, 2H, COH), 7.84–7.82 (m, 2H, Ar-H), 7.57–7.50 (m, 4H, Ar-H), 7.46–7.42 (m, 2H, Ar-H), 7.07–7.03 (m, 4H, Ar-H), 5.32 (s, 4H, PhCH<sub>2</sub>).

#### Preparation of **7**.

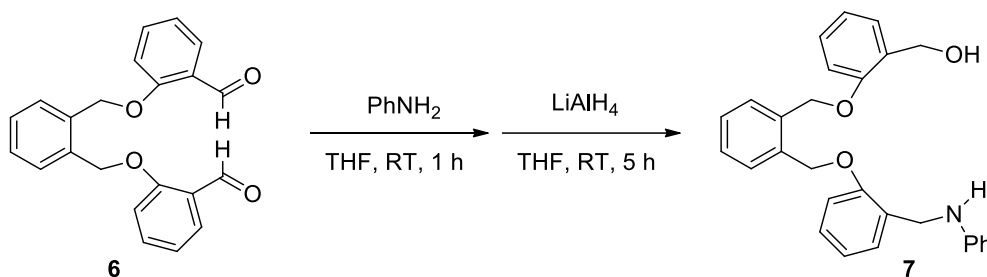

Under a N<sub>2</sub> atmosphere, a THF (35 mL) solution of **6** (2.0 g, 5.7 mmol) was placed in a round bottomed flask equipped with a three-way cock. At room temperature, aniline (0.52 mL, 5.7 mmol) was added dropwise to the solution, and the mixture was stirred at room temperature for 1 h. After H<sub>2</sub>O (35 mL) was added, THF was removed using an evaporator. The residual aqueous suspension was transferred to a separatory funnel with CHCl<sub>3</sub> (35 mL), with which the organic layer was separated using additional CHCl<sub>3</sub> (35 mL × 2) and washed with saturated aqueous NaCl solution and water. The organic layer was dried over Na<sub>2</sub>SO<sub>4</sub>. After the volatiles were removed under reduced pressure to afford a crude mixture containing the desired mono-imine, which was subjected to the reduction with LiAlH<sub>4</sub>.

Under a N<sub>2</sub> atmosphere, a THF (35 mL) suspension of LiAlH<sub>4</sub> (0.65 g, 17 mmol) was placed in a round bottomed flask equipped with a three-way cock and was cooled to 0 °C. At 0 °C, a THF solution (24 mL) of the above-obtained crude mixture was added dropwise to the suspension, and the mixture was stirred at room temperature for 5 h. The mixture was cooled to 0 °C, and H<sub>2</sub>O (30 mL) was carefully added very slowly to quench the remaining LiAlH<sub>4</sub>. The resulting mixture was filtered through Celite, and THF was removed using an evaporator from the filtrate. The residual

aqueous suspension was transferred to a separatory funnel with  $\text{CH}_2\text{Cl}_2$  (30 mL), with which the organic layer was separated using additional  $\text{CH}_2\text{Cl}_2$  (30 mL  $\times$  2). The organic layer was dried over  $\text{Na}_2\text{SO}_4$ . After  $\text{Na}_2\text{SO}_4$  was removed by filtration, volatiles were removed under reduced pressure. The residue was subjected to purification with flash chromatography using a mixture of hexane and AcOEt (hexane : AcOEt = 1:0–0:1) as an eluent to afford **7** as a yellow solid (1.1 g, 2.5 mol) in 44% yield.

$^1\text{H}$  NMR (400 MHz,  $\text{CDCl}_3$ ,  $\delta$ ): 7.53–7.49 (m, 2H, Ar-*H*), 7.41–7.38 (m, 2H, Ar-*H*), 7.36–7.30 (m, 2H, Ar-*H*), 7.25–7.20 (m, 2H, Ar-*H*), 7.15–7.11 (m, 2H, Ar-*H*), 7.00–6.90 (m, 4H, Ar-*H*), 6.70–6.66 (m, 1H, Ar-*H*), 6.59–6.57 (m, 2H, Ar-*H*), 5.23 (s, 2H,  $\text{PhCH}_2$ ), 5.22 (s, 2H,  $\text{PhCH}_2$ ), 4.68 (s, 2H,  $\text{OCH}_2$ ), 4.34 (s, 2H,  $\text{NCH}_2$ ), 4.11 (br-s, 1H, NH), 2.17 (br-s, 1H, OH).

#### Preparation of **8**.

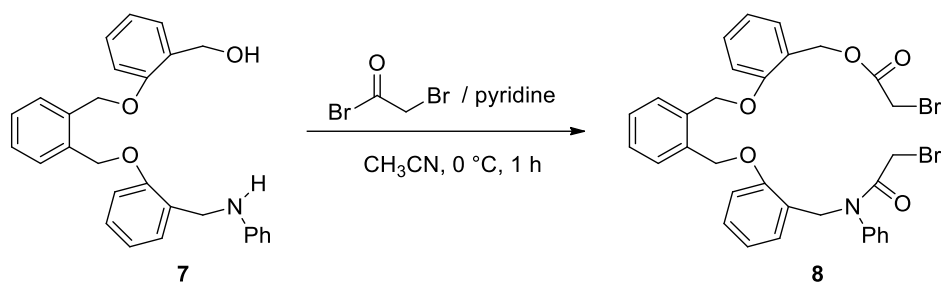

Under a  $\text{N}_2$  atmosphere, an acetonitrile (15 mL) solution of **7** (0.52 g, 1.2 mmol) and pyridine (0.30 mL, 3.7 mmol) was placed in a round bottomed flask equipped with a three-way cock and was cooled to 0 °C. At 0 °C, bromoacetyl bromide (0.27 mL, 3.1 mmol) was added dropwise to the solution, and the mixture was stirred at 0 °C for 1 h. After  $\text{H}_2\text{O}$  (15 mL), acetonitrile was removed using an evaporator. The residual aqueous suspension was transferred to a separatory funnel with  $\text{CHCl}_3$  (15 mL), with which the organic layer was separated using additional  $\text{CHCl}_3$  (15 mL  $\times$  2) and washed with saturated aqueous NaCl solution and water. The organic layer was dried over  $\text{Na}_2\text{SO}_4$ . After the volatiles were removed under reduced pressure, the residue was subjected to purification with preparative recycling SEC using  $\text{CHCl}_3$  as an eluent to afford bis-bromoacetylated compound **8** as a dark brown solid (0.78 g, 1.2 mmol) in 95% yield.

$^1\text{H}$  NMR (400 MHz,  $\text{CDCl}_3$ ,  $\delta$ ): 7.47–7.45 (m, 1H, Ar-*H*), 7.40–7.17 (m, 10H, Ar-*H*), 7.08–7.06 (m, 2H, Ar-*H*), 7.00–6.91 (m, 3H, Ar-*H*), 6.83–6.81 (m, 1H, Ar-*H*), 5.25 (s, 2H,  $\text{CH}_2$ ), 5.08 (s, 2H,  $\text{CH}_2$ ), 5.01 (s, 2H,  $\text{CH}_2$ ), 4.98 (s, 2H,  $\text{CH}_2$ ), 3.75 (s, 2H,  $\text{CO-CH}_2$ ), 3.63 (s, 2H,  $\text{CO-CH}_2$ ).

#### Preparation of **8**.

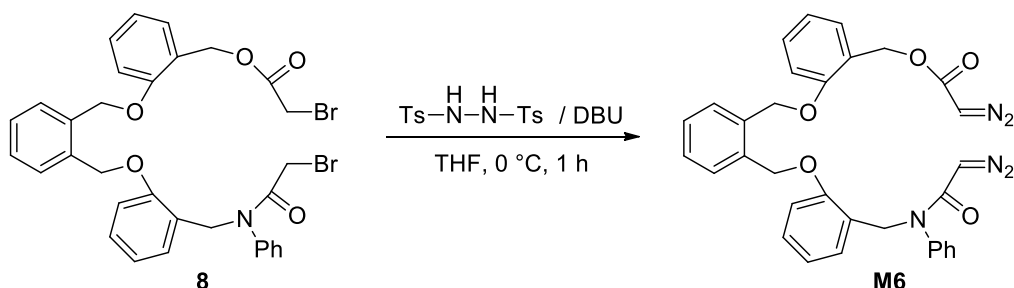

Under a  $\text{N}_2$  atmosphere, a THF (20 mL) solution of **8** (0.78 g, 1.2 mmol) and *N,N'*-ditosylhydrazine (2.4 g, 7.0 mmol) was placed in a round bottomed flask equipped with a three-way cock and was cooled to 0 °C. At 0 °C, DBU (2.6 mL, 18 mmol) was added dropwise to the solution, and the mixture was stirred at 0 °C for 1 h. After saturated  $\text{NaHCO}_3$  aqueous solution (20 mL) was added, THF was removed using an evaporator. The residual aqueous suspension was

transferred to a separatory funnel with  $\text{CHCl}_3$  (20 mL), with which the organic layer was separated using additional  $\text{CHCl}_3$  (20 mL  $\times$  2) and washed with saturated aqueous NaCl solution and water. The organic layer was dried over  $\text{Na}_2\text{SO}_4$ . After the volatiles were removed under reduced pressure, the residue was subjected to purification with flash chromatography using a mixture of hexane and AcOEt (hexane : AcOEt = 1:9–4:6) as an eluent to afford **M6** as a yellow solid (0.50 g, 0.90 mmol) in 76% yield.

$^1\text{H}$  NMR (400 MHz,  $\text{CDCl}_3$ ,  $\delta$ ): 7.47–7.45 (m, 1H, Ar-*H*), 7.42–7.40 (m, 1H, Ar-*H*), 7.34–7.16 (m, 9H, Ar-*H*), 7.05–7.03 (m, 2H, Ar-*H*), 6.99–6.93 (m, 2H, Ar-*H*), 6.91–6.89 (m, 1H, Ar-*H*), 6.84–6.82 (m, 1H, Ar-*H*), 5.25 (s, 2H,  $\text{CH}_2$ ), 5.07 (s, 2H,  $\text{CH}_2$ ), 5.03 (s, 2H,  $\text{CH}_2$ ), 5.00 (s, 2H,  $\text{CH}_2$ ), 4.69 (s, 1H,  $\text{N}_2\text{-CH-CO}_2$ ), 4.46 (s, 1H,  $\text{N}_2\text{-CH-CON}$ ).

$^{13}\text{C}$  NMR (100 MHz,  $\text{CDCl}_3$ ,  $\delta$ ): 166.9 (br,  $\text{N}_2\text{-CH-CO}_2$ ), 166.1 ( $\text{N}_2\text{-CH-CON}$ ), 156.6 (Ar-C, q.), 156.4 (Ar-C, q.), 142.0 (Ar-C, q.), 135.2 (Ar-C, q.), 134.6 (Ar-C, q.), 130.1 (Ar-C), 130.1 (Ar-C), 129.9 (Ar-C), 129.5 (Ar-C), 128.7 (Ar-C), 128.6 (Ar-C), 128.5 (Ar-C), 128.3 (Ar-C), 128.0 (Ar-C), 126.2 (Ar-C, q.), 124.6 (Ar-C, q.), 121.3 (Ar-C), 121.1 (Ar-C), 111.9 (Ar-C), 111.8 (Ar-C), 68.1 ( $\text{CH}_2$ ), 67.9 ( $\text{CH}_2$ ), 62.2 ( $\text{CH}_2$ ), 47.6 ( $\text{CH}_2$ ), 47.6 ( $\text{N}_2\text{-CH-CON}$ ), 46.4 ( $\text{N}_2\text{-CH-CO}_2$ ).

Elemental analyses: Anal. Calcd for  $\text{C}_{32}\text{H}_{27}\text{N}_5\text{O}_5 + 4 \text{H}_2\text{O}$ : C, 60.66; H, 5.57; N, 11.05. Found: C, 58.94; H, 4.54; N, 10.19.

*Preparation of 2-diazo-*N*-methyl-*N*-phenylacetamide (M1) from *N*-methylaniline with bromoacetylation followed by treatment with *N,N'*-ditosylhydrazine and DBU.*

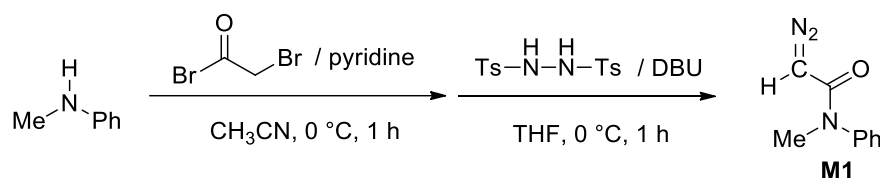

Under a  $\text{N}_2$  atmosphere, a  $\text{CH}_2\text{Cl}_2$  (40 mL) solution of *N*-methylaniline (1.0 mL, 10 mmol) was placed in a round bottomed flask equipped with a three-way cock and was cooled to 0 °C. At 0 °C, bromoacetyl bromide (1.0 mL, 11 mmol) was added dropwise to the solution, and the mixture was warmed to room temperature and stirred at room temperature for 1 h. After saturated aqueous solution of  $\text{NaHCO}_3$  (40 mL), the mixture was transferred to a separatory funnel, with which the organic layer was separated using additional  $\text{CH}_2\text{Cl}_2$  (40 mL  $\times$  2) and washed with saturated aqueous NaCl solution and water. The organic layer was dried over  $\text{Na}_2\text{SO}_4$ . After the volatiles were removed under reduced pressure, *N,N'*-ditosylhydrazine (6.8 g 20 mmol) and THF (40 mL) was added to the residue under a  $\text{N}_2$  atmosphere to form a suspension, which was cooled to 0 °C. At 0 °C, DBU (7.5 mL, 50 mmol) was added dropwise to the suspension, and the mixture was stirred at 0 °C for 1 h. After saturated  $\text{NaHCO}_3$  aqueous solution (20 mL), THF was removed using an evaporator. The aqueous suspension was transferred to a separatory funnel with  $\text{CHCl}_3$  (20 mL), with which the organic layer was separated using additional  $\text{CHCl}_3$  (20 mL  $\times$  2) and washed with saturated aqueous NaCl solution and water. The organic layer was dried over  $\text{Na}_2\text{SO}_4$ . After the volatiles were removed under reduced pressure, the residue was subjected to purification with flash chromatography using a mixture of hexane and AcOEt (hexane : AcOEt = 1:9–4:6) as an eluent to afford **M1** as yellow viscous oil (1.7 g, 0.95 mmol) in 95% yield.

## Polymerization

### Copolymerization of EDA and **M1**.

As a typical example, a copolymerization procedure for run 5 in Table 1 is described as follows.

Under a N<sub>2</sub> atmosphere, a THF (5 mL) solution of (NHC)Pd(nq) (4.55 mg, 0.00800 mmol) was placed in a Schlenk tube, and was cooled to -78 °C. NaBPh<sub>4</sub> (3.29 mg, 0.00960 mmol) was added to the solution and the mixture was stirred for 15 min at -78 °C. At -78 °C, a THF (3 mL) solution of **M1** (46.0 mg, 0.285 mmol) and EDA (0.26 mL of 2.02 M solution of CH<sub>2</sub>Cl<sub>2</sub>, 0.53 mmol) was added, and the mixture was warmed to 50 °C and stirred at 50 °C for 15 h. After volatiles were removed under reduced pressure, 1N NCl/MeOH solution (10 mL), 1N HCl aq. (10 mL), and CHCl<sub>3</sub> (20 mL) were added and the mixture was transferred to a separatory funnel, with which the organic layer was separated and washed with saturated aqueous NaCl solution and water. The organic layer was dried over Na<sub>2</sub>SO<sub>4</sub>. After Na<sub>2</sub>SO<sub>4</sub> was removed by filtration and the volatiles were removed under reduced pressure, the residue was subjected to purification with preparative recycling SEC using CHCl<sub>3</sub> as an eluent to afford a copolymer in 41% yield (31.5 mg).

#### *Polymerization of hetero-bis(diazocarbonyl) compound.*

As a typical example, a polymerization procedure for run 9 in Table 2 is described as follows.

Under a N<sub>2</sub> atmosphere, a THF (2.0 mL) solution of (π-allylPdCl)<sub>2</sub> (1.36 mg, 0.00372 mmol) was placed in a Schlenk tube, and was cooled to -78 °C. NaBPh<sub>4</sub> (4.4 mg, 0.0129 mmol) was added to the solution and the mixture was stirred for 10 min at -78 °C. At -78 °C, a THF (4.2 mL) solution of **M5** (81.9 mg, 0.187 mmol) was added, and the mixture was warmed to 50 °C and stirred at 50 °C for 15 h. After volatiles were removed under reduced pressure, 1N NCl/MeOH solution (10 mL), 1 N HCl aq. (10 mL), and CHCl<sub>3</sub> (20 mL) were added and the mixture was transferred to a separatory funnel, with which the organic layer was separated and washed with saturated aqueous NaCl solution and water. The organic layer was dried over Na<sub>2</sub>SO<sub>4</sub>. After Na<sub>2</sub>SO<sub>4</sub> was removed by filtration and the volatiles were removed under reduced pressure, the residue was subjected to purification with preparative recycling SEC using CHCl<sub>3</sub> as an eluent to afford a copolymer in 26% yield (18.6 mg).

### Measurements

The molar mass distributions of polymers were measured via SEC in THF (flow rate = 1.0 mL/min) at 40 °C on polystyrene gel columns [Styragel HR4 and Styragel HR2 (Waters, molar-mass exclusion limit = 600 kDa and 20 kDa for polystyrene, respectively)] connected to a pump (JASCO, PU-4180), a column oven (JASCO, CO-2065 Plus), an ultraviolet detector (JASCO, UV-4075), and a refractive index detector (JASCO, RI-2031 Plus). The number-average molar mass ( $M_n$ ) and dispersity [ $\bar{D}$ ; weight-average molar mass/number-average molar mass ( $M_w/M_n$ )] were calculated from the chromatographs on the basis of six poly(methyl methacrylate) (PMMA) standards (Shodex M-75;  $M_p$  = 2400–212000,  $\bar{D}$  < 1.1) and dibutyl sebacate (molar mass = 314.5). The absolute molecular weight of the polymers was determined by SEC coupled with multiangle light scattering (SEC-MALS) on a Dawn HELEOS II 8+ (Wyatt Technology;  $\lambda$  = 661.5 nm). The refractive index increment (dn/dc) values were measured assuming 100% mass recovery.

NMR spectra were recorded on a Bruker Avance 400 (400 MHz for <sup>1</sup>H and 100 MHz for <sup>13</sup>C) or Avance 500 (500 MHz for <sup>1</sup>H and 126 MHz for <sup>13</sup>C) spectrometer at room temperature (monomers and their precursors) or at 50 °C (polymers).

MALDI-TOF-MS (matrix-assisted laser desorption/ionization time-of-flight mass spectrometry) data were recorded on a JMS-S3000 (JEOL, spiral mode) using super-DHB (Merck, a mixture of 2,5-dihydroxybenzoic acid and 2-hydroxy-5-methoxybenzoic acid) as a matrix and sodium trifluoroacetate as an ion source. The calibration was carried out using poly(ethylene glycol) ( $M_n$  = 2700–3500).

Glass transition temperature ( $T_g$ ) of polymers were determined by differential scanning calorimetry (DSC; Seiko



Instruments Inc., EXSTAR DSC6000). The heating and cooling rates were 10 °C/min. The  $T_g$  was defined as the temperature of the midpoint of a heat capacity change on the second heating scan.

Fourier transform infrared (FTIR) spectra of the samples (in the form of KBr pellets) were recorded using a Spectrum Two (PerkinElmer) at room temperature.

Elemental analyses were performed on a YANAKO CHN Corder MT-5.

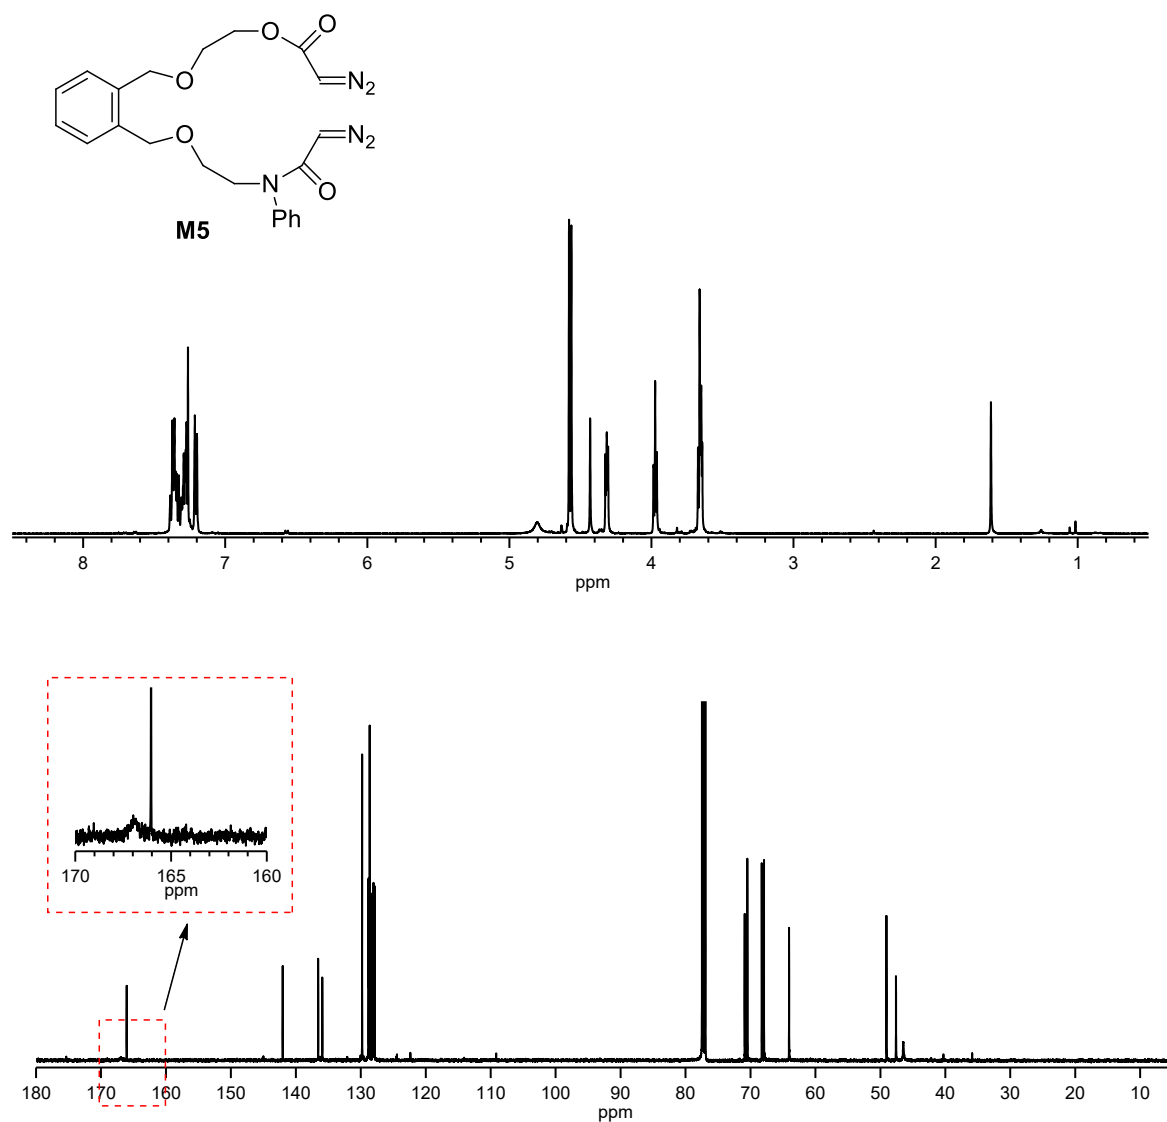

$^1\text{H}$  NMR (500 MHz,  $\text{CDCl}_3$ ,  $\delta$ ): 7.39–7.20 (m, 9H, Ar-H), 4.81 (br-s, 1H,  $\text{N}_2\text{-CH-CO}_2$ ), 4.58 (s, 2H,  $\text{PhCH}_2$ ), 4.57 (s, 2H,  $\text{PhCH}_2$ ), 4.43 (s, 1H,  $\text{N}_2\text{-CH-CON}$ ), 4.31 (t,  $J = 4.8$  Hz, 2H,  $\text{OCH}_2$ ), 3.97 (t,  $J = 5.8$  Hz, 2H,  $\text{OCH}_2$ ), 3.67 (t,  $J = 5.8$  Hz, 2H,  $\text{NCH}_2$ ), 3.65 (t,  $J = 4.8$  Hz, 2H,  $\text{OCH}_2$ ).

$^{13}\text{C}$  NMR (126 MHz,  $\text{CDCl}_3$ ,  $\delta$ ): 167.0 (br,  $\text{N}_2\text{-CH-CO}_2$ ), 166.0 ( $\text{N}_2\text{-CH-CON}$ ), 142.0 [Ar-C, quaternary (q.)], 136.6 (Ar-C, q.), 135.9 (Ar-C, q.), 129.8 (Ar-C), 128.8 (Ar-C), 128.8 (Ar-C), 128.6 (Ar-C), 128.2 (Ar-C), 128.0 (Ar-C), 127.9 (Ar-C), 70.9 ( $\text{CH}_2$ ), 70.5 ( $\text{CH}_2$ ), 68.3 ( $\text{CH}_2$ ), 67.9 ( $\text{CH}_2$ ), 64.1 ( $\text{CH}_2$ ), 49.1 ( $\text{CH}_2$ ), 47.6 ( $\text{N}_2\text{-CH-CON}$ ), 46.5 (br,  $\text{N}_2\text{-CH-CO}_2$ ).

**Figure S1.**  $^1\text{H}$  (upper) and  $^{13}\text{C}$  (lower) NMR spectra of **M5**.

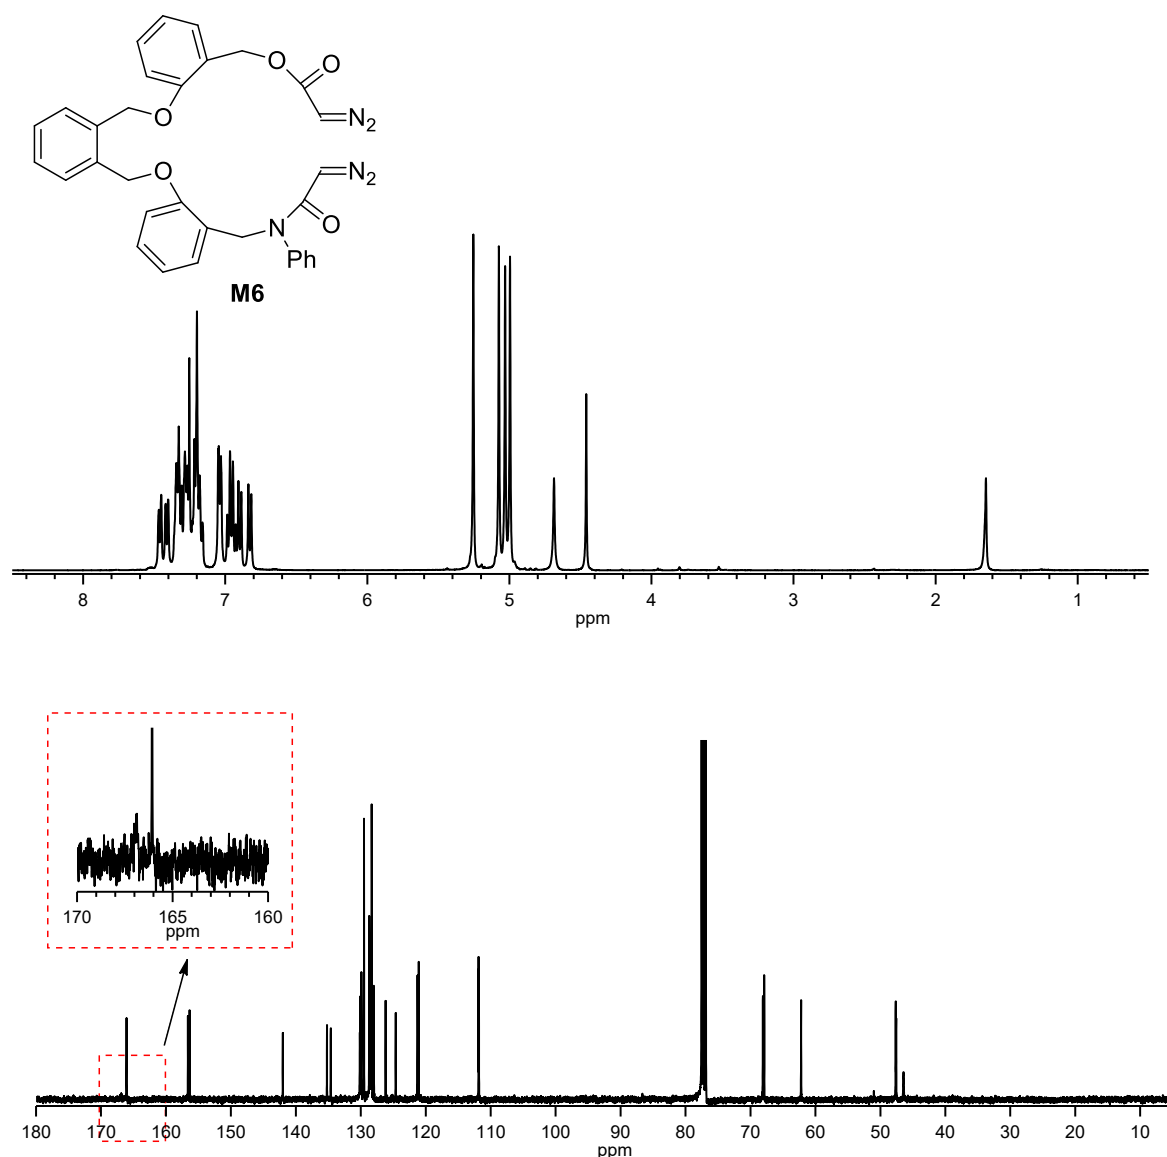

$^1\text{H}$  NMR (400 MHz,  $\text{CDCl}_3$ ,  $\delta$ ): 7.47–7.45 (m, 1H, Ar-H), 7.42–7.40 (m, 1H, Ar-H), 7.34–7.16 (m, 9H, Ar-H), 7.05–7.03 (m, 2H, Ar-H), 6.99–6.93 (m, 2H, Ar-H), 6.91–6.89 (m, 1H, Ar-H), 6.84–6.82 (m, 1H, Ar-H), 5.25 (s, 2H,  $\text{CH}_2$ ), 5.07 (s, 2H,  $\text{CH}_2$ ), 5.03 (s, 2H,  $\text{CH}_2$ ), 5.00 (s, 2H,  $\text{CH}_2$ ), 4.69 (s, 1H,  $\text{N}_2\text{-CH-CO}_2$ ), 4.46 (s, 1H,  $\text{N}_2\text{-CH-CON}$ ).

$^{13}\text{C}$  NMR (100 MHz,  $\text{CDCl}_3$ ,  $\delta$ ): 166.9 (br,  $\text{N}_2\text{-CH-CO}_2$ ), 166.1 ( $\text{N}_2\text{-CH-CON}$ ), 156.6 (Ar-C, q.), 156.4 (Ar-C, q.), 142.0 (Ar-C, q.), 135.2 (Ar-C, q.), 134.6 (Ar-C, q.), 130.1 (Ar-C), 130.1 (Ar-C), 129.9 (Ar-C), 129.5 (Ar-C), 128.7 (Ar-C), 128.6 (Ar-C), 128.5 (Ar-C), 128.3 (Ar-C), 128.0 (Ar-C), 126.2 (Ar-C, q.), 124.6 (Ar-C, q.), 121.3 (Ar-C), 121.1 (Ar-C), 111.9 (Ar-C), 111.8 (Ar-C), 68.1 ( $\text{CH}_2$ ), 67.9 ( $\text{CH}_2$ ), 62.2 ( $\text{CH}_2$ ), 47.6 ( $\text{CH}_2$ ), 47.6 ( $\text{N}_2\text{-CH-CON}$ ), 46.4 ( $\text{N}_2\text{-CH-CO}_2$ ).

**Figure S2.**  $^1\text{H}$  (upper) and  $^{13}\text{C}$  (lower) NMR spectra of **M6**.

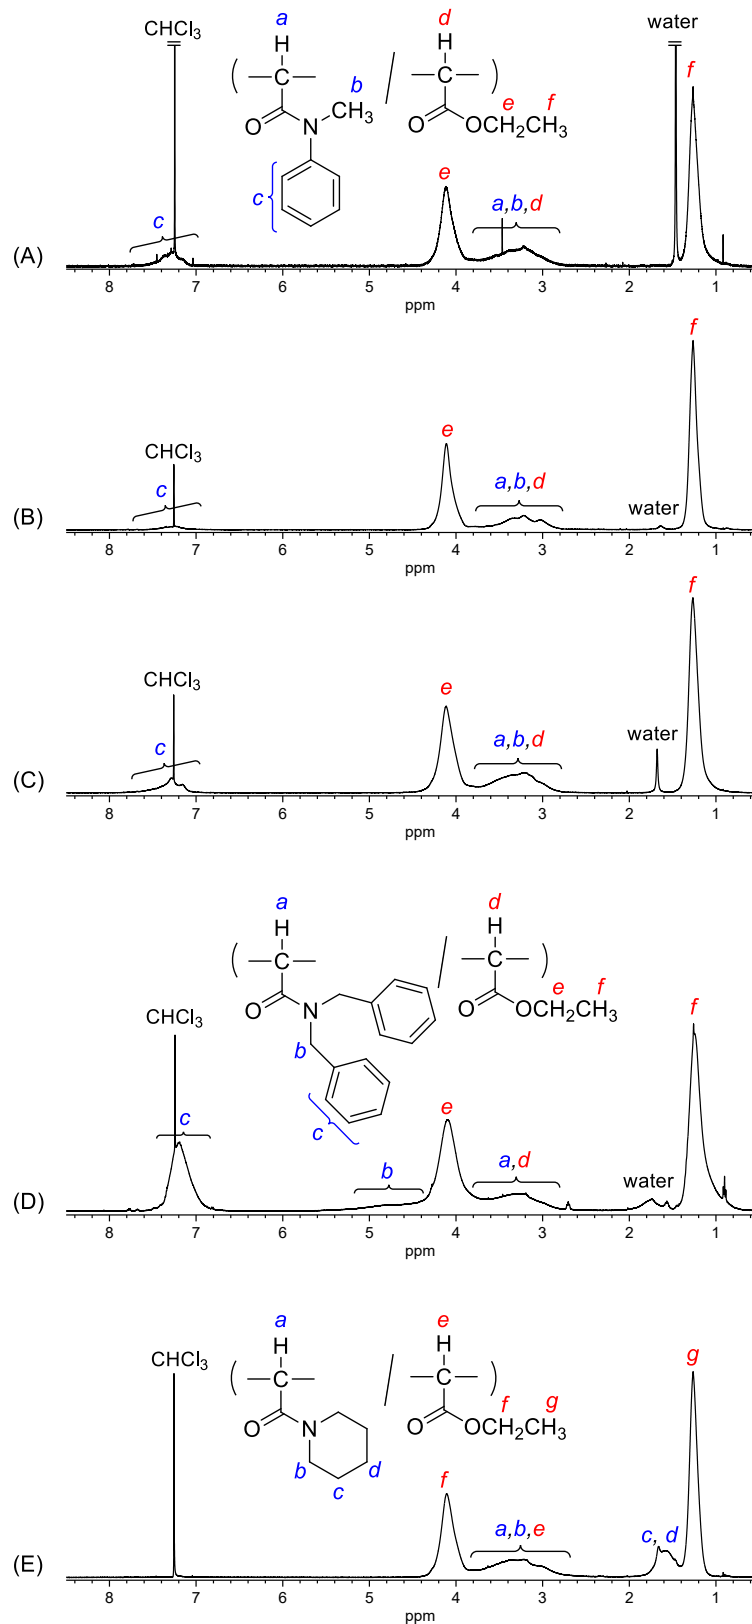

**Figure S3.**  $^1\text{H}$  NMR spectra of (A) poly(M1'-co-EDA') obtained in run 2 in Table 1, (B) poly(M1'-co-EDA') obtained in run 3 in Table 1, (C) poly(M1'-co-EDA') obtained in run 6 in Table 1, (D) poly(M2'-co-EDA') obtained in run 7 in Table 1, and (E) poly(M3'-co-EDA') obtained in run 8 in Table 1.

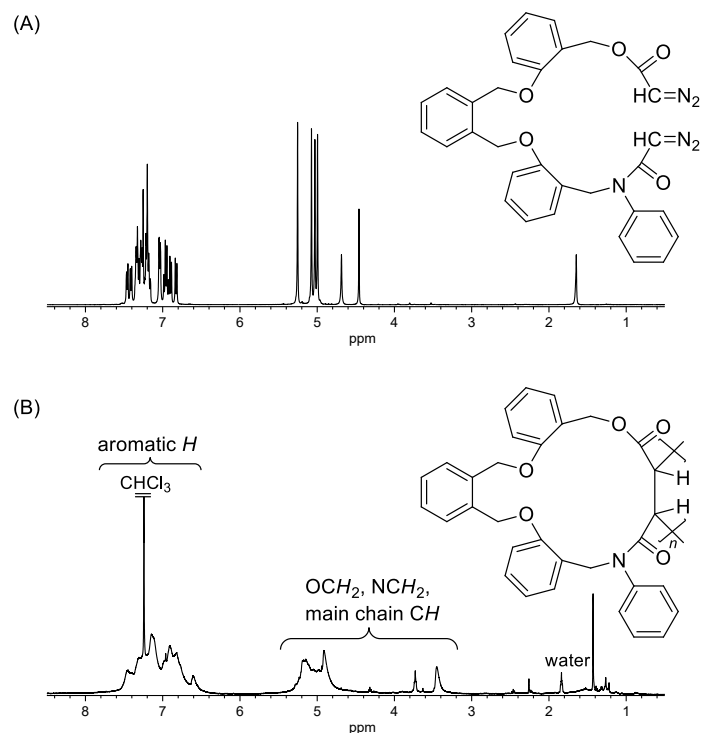

Elemental analyses: Anal. Calcd for  $[C_{32}H_{27}NO_5]_n + 4.5n H_2O$ : C, 65.52; H, 6.19; N, 2.39. Found: C, 65.24; H, 5.12; N, 2.79.

**Figure S4.**  $^1H$  NMR of (A) **M6** and (B) **pM6'**.

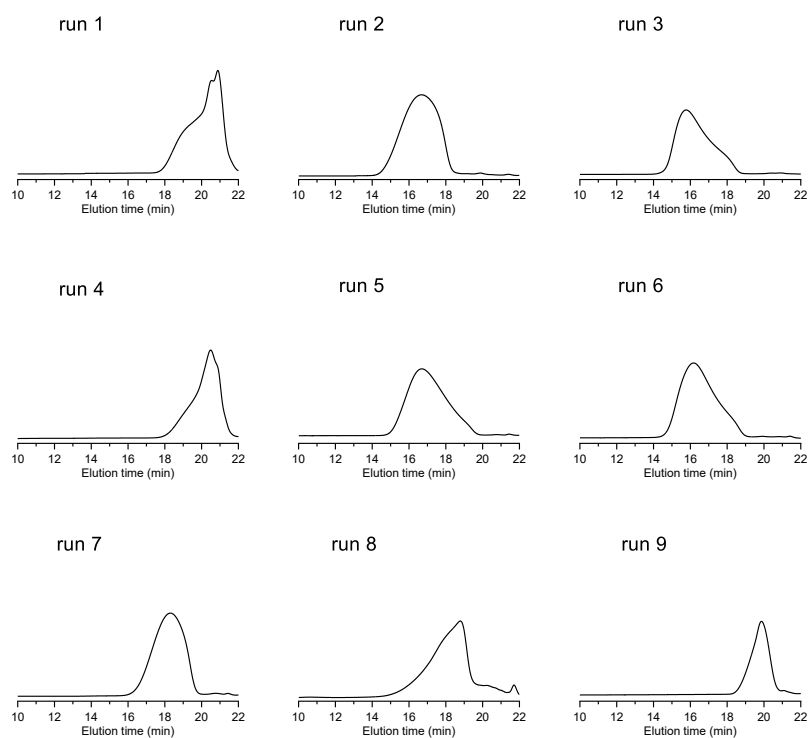

**Figure S5.** SEC traces of the polymeric products listed in Table 1.

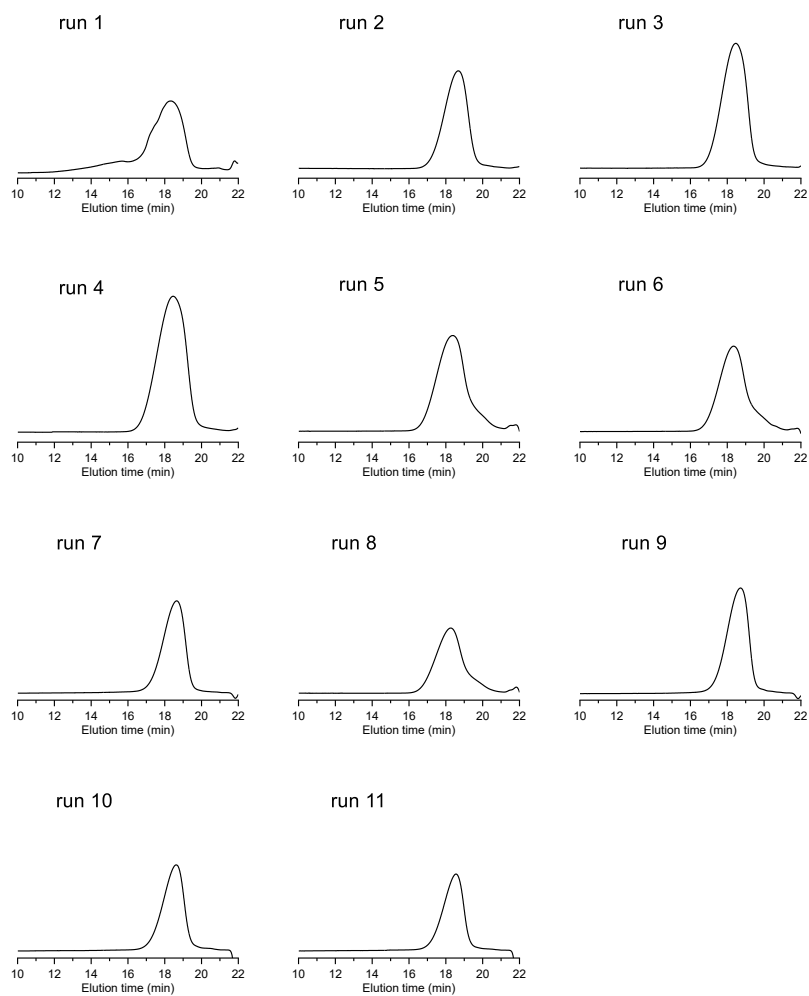

**Figure S6.** SEC traces of the polymeric products listed in Table 2.

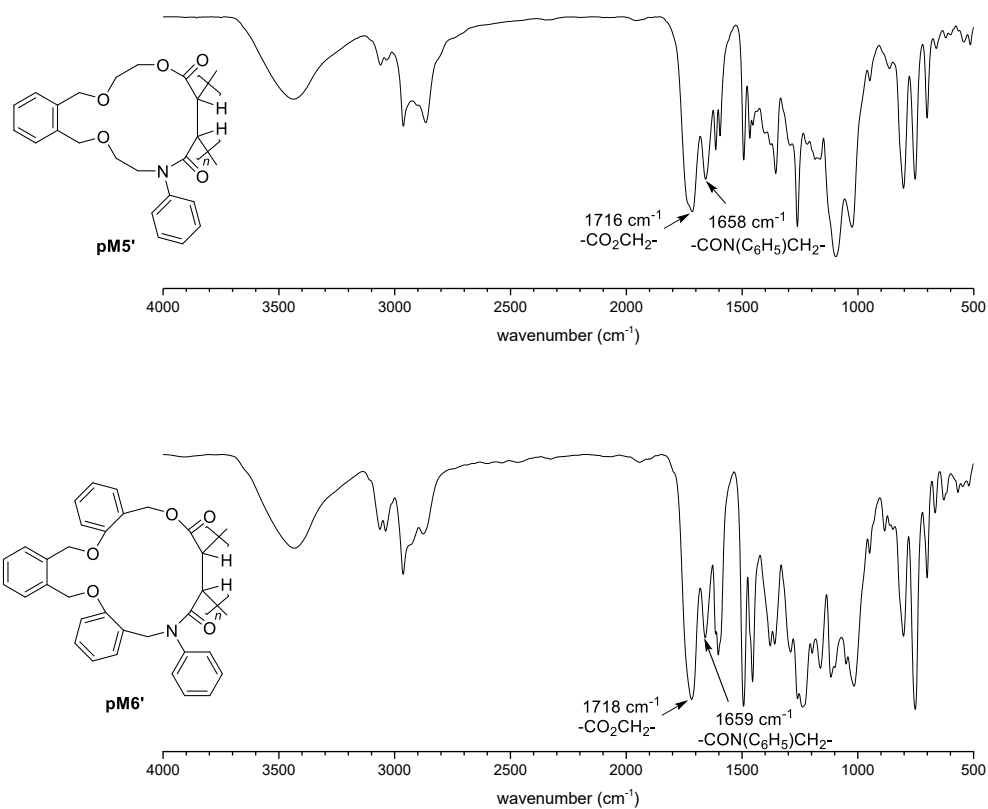

**Figure S7.** FTIR spectra of **pM5'** (upper, run 7 in Table 2) and **pM6'** (lower, run 11 in Table 2).

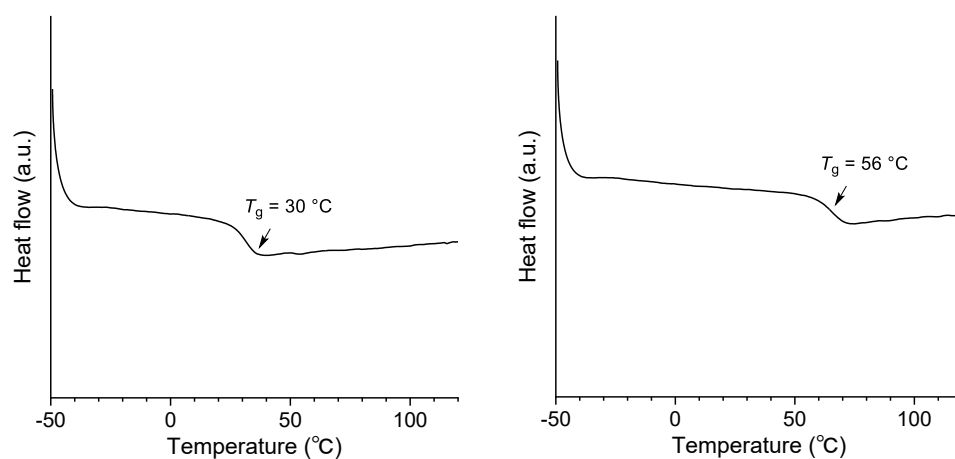

**Figure S8.** DSC thermograms of **pM5'** (left, run 7 in Table 2) and **pM6'** (right, run 11 in Table 2).

## References

- (1) T. Toma, J. Shimokawa and T. Fukuyama, *N,N'*-Ditosylhydrazine: A Convenient Reagent for Facile Synthesis of Diazoacetates, *Org. Lett.*, 2007, **9**, 3195–3197.
- (2) N. E. Searle, *Organic Synthesis Collection Vol. 4*, N. Rabjohn, Ed., John Wiley and Sons: New York, 1963, pp 424–426.
- (3) T. Yokoi, H. Tanimoto, T. Ueda, T. Morimoto and K. Kakiuchi, Site-Selective Conversion of Azido Groups at Carbonyl  $\alpha$ -Positions to Diazo Groups in Diazido and Triazido Compounds, *J. Org. Chem.*, 2018, **83**, 12103–12121.
- (4) A. Ouhia, L. Rene, J. Guilhem, C. Pascard and B. Badet, A New Diazoacylating Reagent: Preparation, Structure, and Use of Succinimidyl Diazoacetate, *J. Org. Chem.*, 1993, **58**, 1641–1642.
- (5) E. Ihara, T. Hiraren, T. Itoh and K. Inoue, Palladium-mediated Polymerization of Diazoacetamide, *Polym. J.*, 2008, **40**, 1094–1098.
- (6) A. Brunner and L. Hintermann, A Sequential Homologation of Alkynes and Aldehydes for Chain Elongation with Optional  $^{13}\text{C}$ -Labeling, *Chem. Eur. J.*, 2016, **22**, 2787–2792.
